# Supplementary material for: A Method for Preparing Surface Sub-Microstructures on Sapphire Surfaces Using Femtosecond Laser Processing Technology
Source: MDPI journal article supplement (doi:10.3390/coatings14040481), 2024-04-14
Supplement: s1 [file s1]

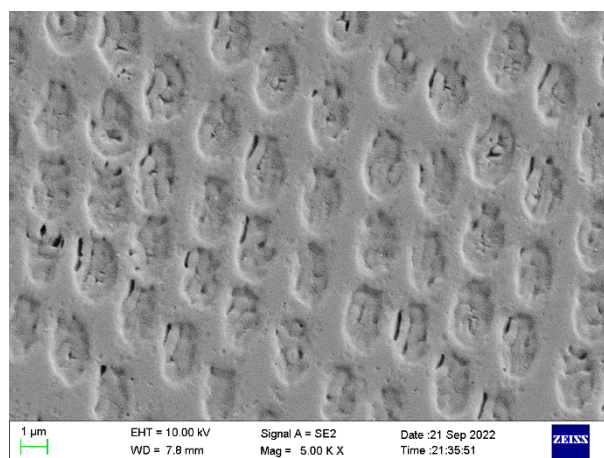

**Figure S1.** The sapphire sub-microstructure images with a cleaning time of 1 hour.

Although the debris on the surface of the sapphire micro/nanostructures has been cleaned, the nanostructures inside the microholes have not been fully exposed.

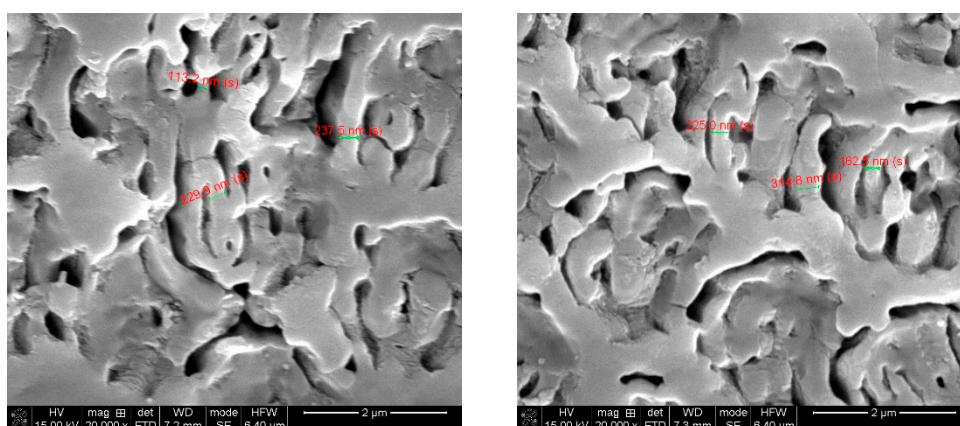

**Figure S2.** The minimum sub-microstructure within a microhole is  $250 \pm 20$  nm or smaller.

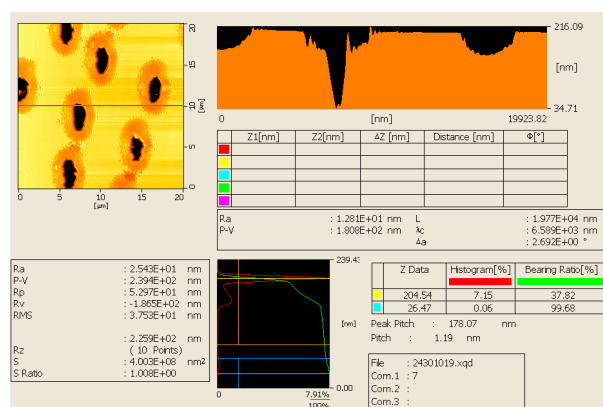

**Figure S3.** The roughness of the sapphire microholes structure is reduced to about 25 nm after hydrofluoric acid cleaning.

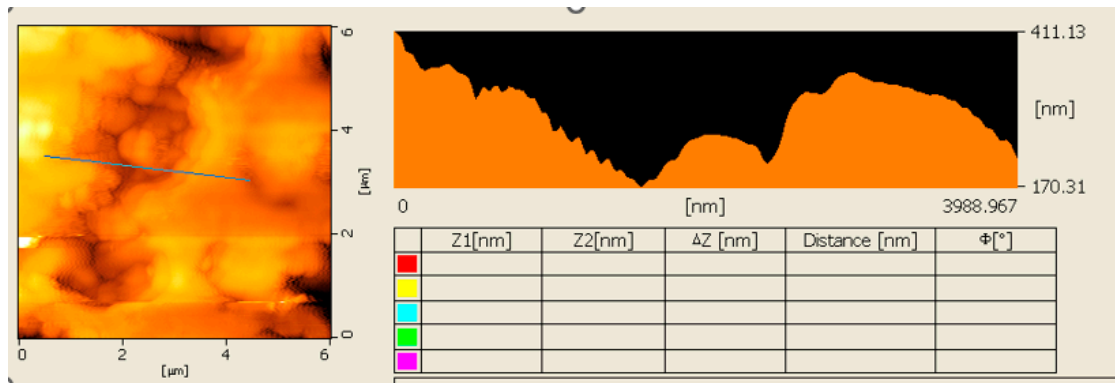

**Figure S4.** AFM map of sapphire sub-microstructure.
